# Supplementary material for: Phytochemical Analysis, Antioxidant, Antimicrobial, and Cytotoxic Activity of Different Extracts of Xanthoparmelia stenophylla Lichen from Stara Planina, Serbia
Source: MDPI journal article supplement (doi:10.3390/plants11131624), 2022-06-21
Supplement: s1 [file s1]

## Phytochemical Analysis, Antioxidant, Antimicrobial, and Cytotoxic Activity of Different Extracts of *Xanthoparmelia stenophylla* Lichen from Stara Planina, Serbia

Aleksandar Kocovic <sup>1</sup>, Jovana Jeremic <sup>1,\*</sup>, Jovana Bradic <sup>1</sup>, Miroslav Sovrljic <sup>1</sup>, Jovica Tomovic <sup>1</sup>, Perica Vasiljevic <sup>2</sup>, Marijana Andjic <sup>1</sup>, Nevena Draginic <sup>1,3</sup>, Mirjana Grujovic <sup>4</sup>, Katarina Mladenovic <sup>4</sup>, Dejan Baskic <sup>5,6</sup>, Suzana Popovic <sup>5</sup>, Sanja Matic <sup>1</sup>, Vladimir Zivkovic <sup>7</sup>, Nevena Jeremic <sup>1,8</sup>, Vladimir Jakovljevic <sup>3,7</sup> and Nedeljko Manojlovic <sup>1</sup>

<sup>1</sup> Department of Pharmacy, Faculty of Medical Sciences, University of Kragujevac, 34000 Kragujevac, Serbia; salekkg91@gmail.com (A.K.); jovanabradickg@gmail.com (J.B.); sofke-ph@hotmail.com (M.S.); jovicatomovic2011@gmail.com (J.T.); andjicmarijana10@gmail.com (M.A.); nevenasdraginic@gmail.com (N.D.); sanjad.matic@gmail.com (S.M.); nbarudzic@hotmail.com (N.J.); mtnedeljko@gmail.com (N.M.)

<sup>2</sup> Department of Biology and Ecology, Faculty of Sciences and Mathematics, University of Niš, 18000 Niš, Serbia; pericavasiljevic@gmail.com

<sup>3</sup> Department of Human Pathology, 1st Moscow State Medical University IM Sechenov, 119991 Moscow, Russia; drvladakgbg@yahoo.com

<sup>4</sup> Department of Science, Institute for Information Technologies, University of Kragujevac, 34000 Kragujevac, Serbia; mirjana.grujovic@pmf.kg.ac.rs (M.G.); katarina.mladenovic@pmf.kg.ac.rs (K.M.)

<sup>5</sup> Centre for Molecular Medicine and Stem Cell Research, Faculty of Medical Sciences, University of Kragujevac, 34000 Kragujevac, Serbia; dejan.baskic@gmail.com (D.B.); popovic007@yahoo.com (S.P.)

<sup>6</sup> Institute of Public Health Kragujevac, 34000 Kragujevac, Serbia

<sup>7</sup> Department of Physiology, Faculty of Medical Sciences, University of Kragujevac, 34000 Kragujevac, Serbia; vladimirziv@gmail.com

<sup>8</sup> Faculty of Pharmacy, IM Sechenov First Moscow State Medical University (Sechenov University), 119991 Moscow, Russia

\* Correspondence: jovana.jeremic@medf.kg.ac.rs; Tel.: +381-3430-6800

**Table S1.** Values used for the calculation of limit of detection (LOD) and limit of quantification (LOQ).

| Compound       | The slope of the calibration curve (k) | The standard deviation of the response ( $\sigma$ ) | Limit of detection (LOD)= $3.3\sigma/k$ | Limit of quantification (LOQ) = $10\sigma/k$ |
|----------------|----------------------------------------|-----------------------------------------------------|-----------------------------------------|----------------------------------------------|
| Lecanoric acid | 20.435109                              | 18.732702                                           | 3.025                                   | 9.167                                        |
| Obtusic acid   | 11.501667                              | 2.055429                                            | 0.590                                   | 1.787                                        |
| Usnic acid     | 2.468396                               | 0.880237                                            | 1.177                                   | 3.566                                        |
| Atranorin      | 3.174977                               | 0.971813                                            | 1.010                                   | 3.061                                        |

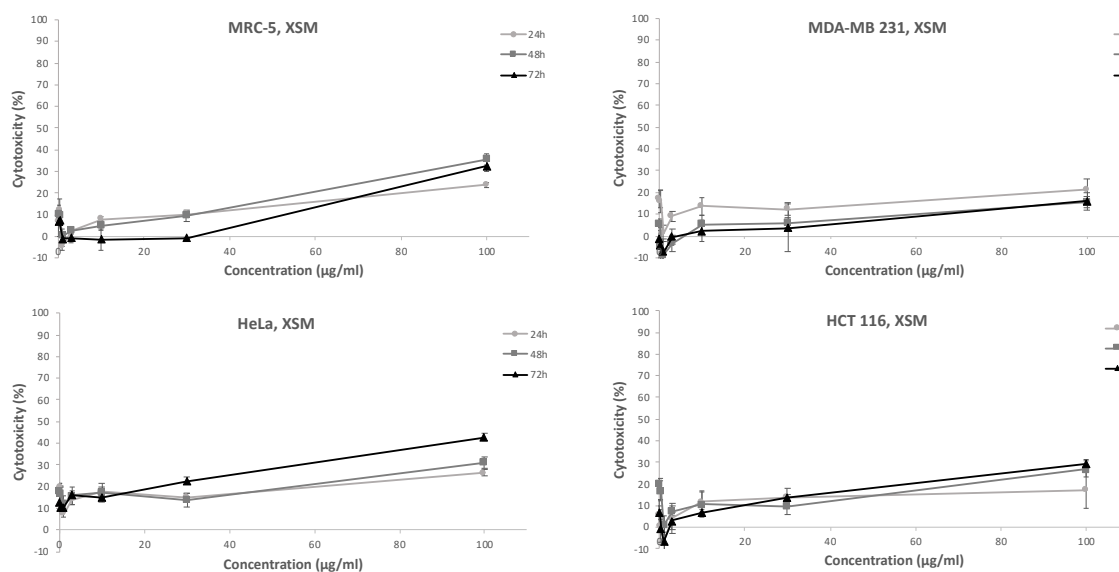

**Figure S1.** Dose-response curves of MTT assay after 24, 48 and 72h treatment of MRC-5, MDA-MB 231 HeLa and HCT 116 with XSM (*Xanthoparmelia stenophylla* methanolic extract). The values are presented as mean  $\pm$  SD of quadruplicates from at least three independent experiments.

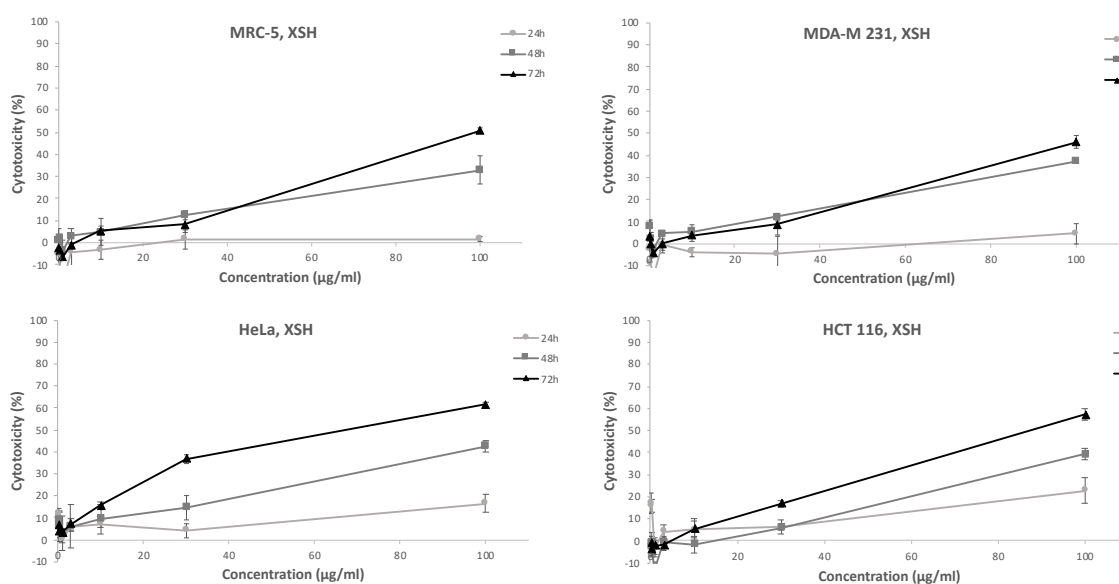

**Figure S2.** Dose-response curves of MTT assay after 24, 48 and 72h treatment of MRC-5, MDA-MB 231 HeLa and HCT 116 with XSH (*Xanthoparmelia stenophylla* hexanic extract). The values are presented as mean  $\pm$  SD of quadruplicates from at least three independent experiments.

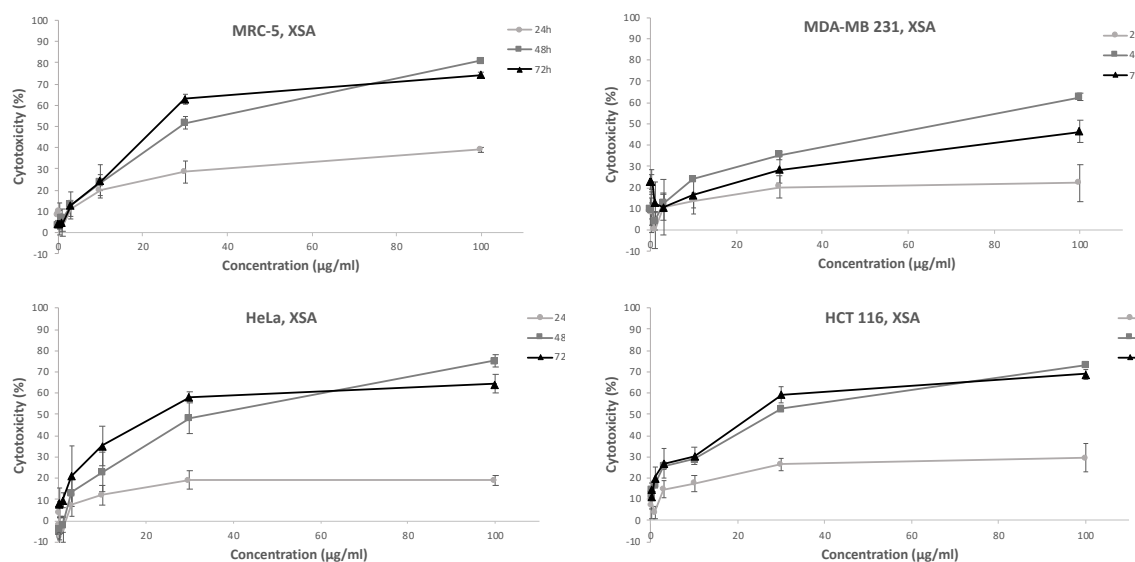

**Figure S3.** Dose-response curves of MTT assay after 24, 48 and 72h treatment of MRC-5, MDA-MB 231 HeLa and HCT 116 with XSA (*Xanthoparmelia stenophylla* acetonic extract). The values are presented as mean  $\pm$  SD of quadruplicates from at least three independent experiments.

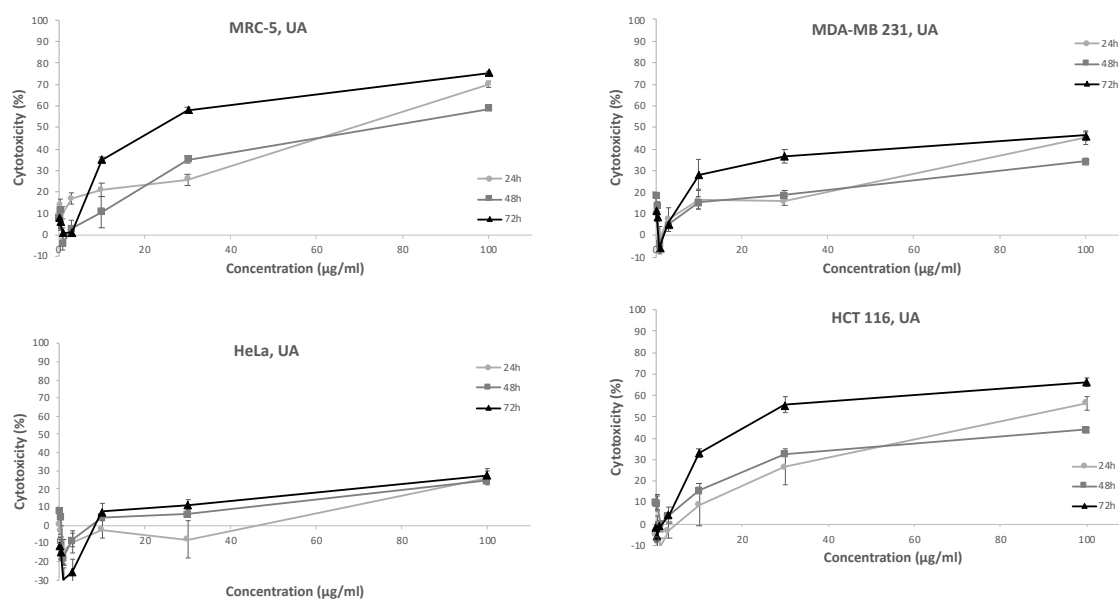

**Figure S4.** Dose-response curves of MTT assay after 24, 48 and 72h treatment of MRC-5, MDA-MB 231 HeLa and HCT 116 with usnic acid. The values are presented as mean  $\pm$  SD of quadruplicates from at least three independent experiments.

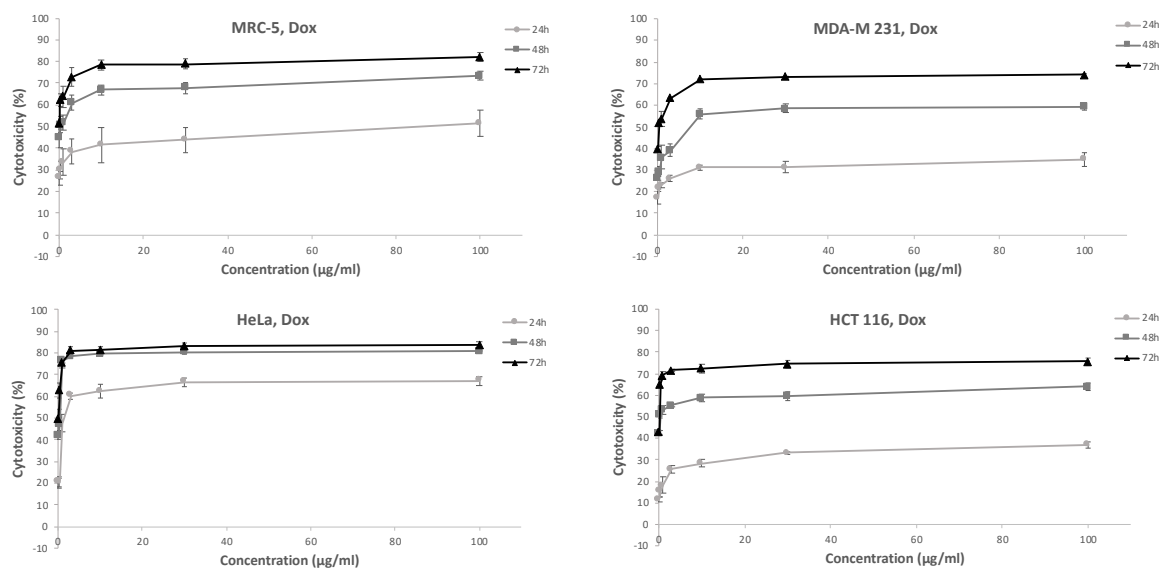

**Figure S5.** Dose-response curves of MTT assay after 24, 48 and 72h treatment of MRC-5, MDA-MB 231 HeLa and HCT 116 with doxorubicin. The values are presented as mean  $\pm$  SD of quadruplicates from at least three independent experiments.
